# Supplementary material for: Cryobanking European Mink (Mustela lutreola) Mesenchymal Stem Cells and Oocytes
Source: MDPI journal article supplement (doi:10.3390/ijms23169319), 2022-08-18
Supplement: s1 [file s1]

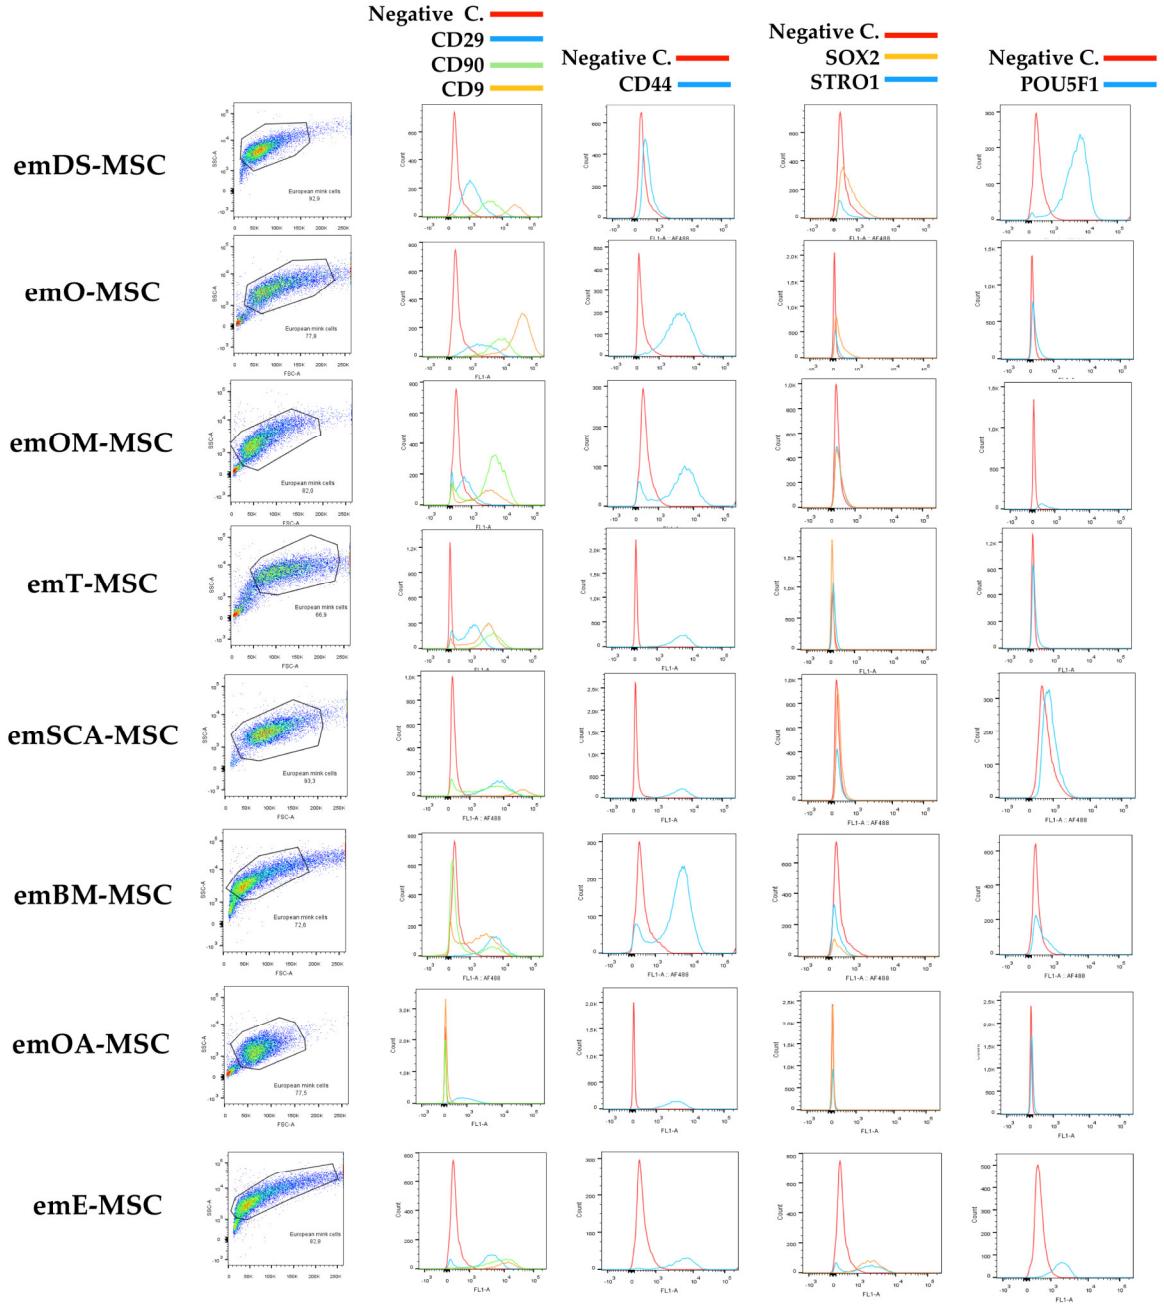

**Figure S1.** Analysis by flow cytometry of the expression levels of cell surface markers CD29, CD90, CD9, CD44, SOX2, STRO1, and POU5F1 in emDS-MSC, emO-MSC, emOM-MSC, emT-MSC, emSCA-MSC and emBM-MSC, emE-MSC and emOA-MSC. Plots depict the log of fluorescence intensity for each sample.
